# ANESTHESIOLOGY

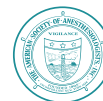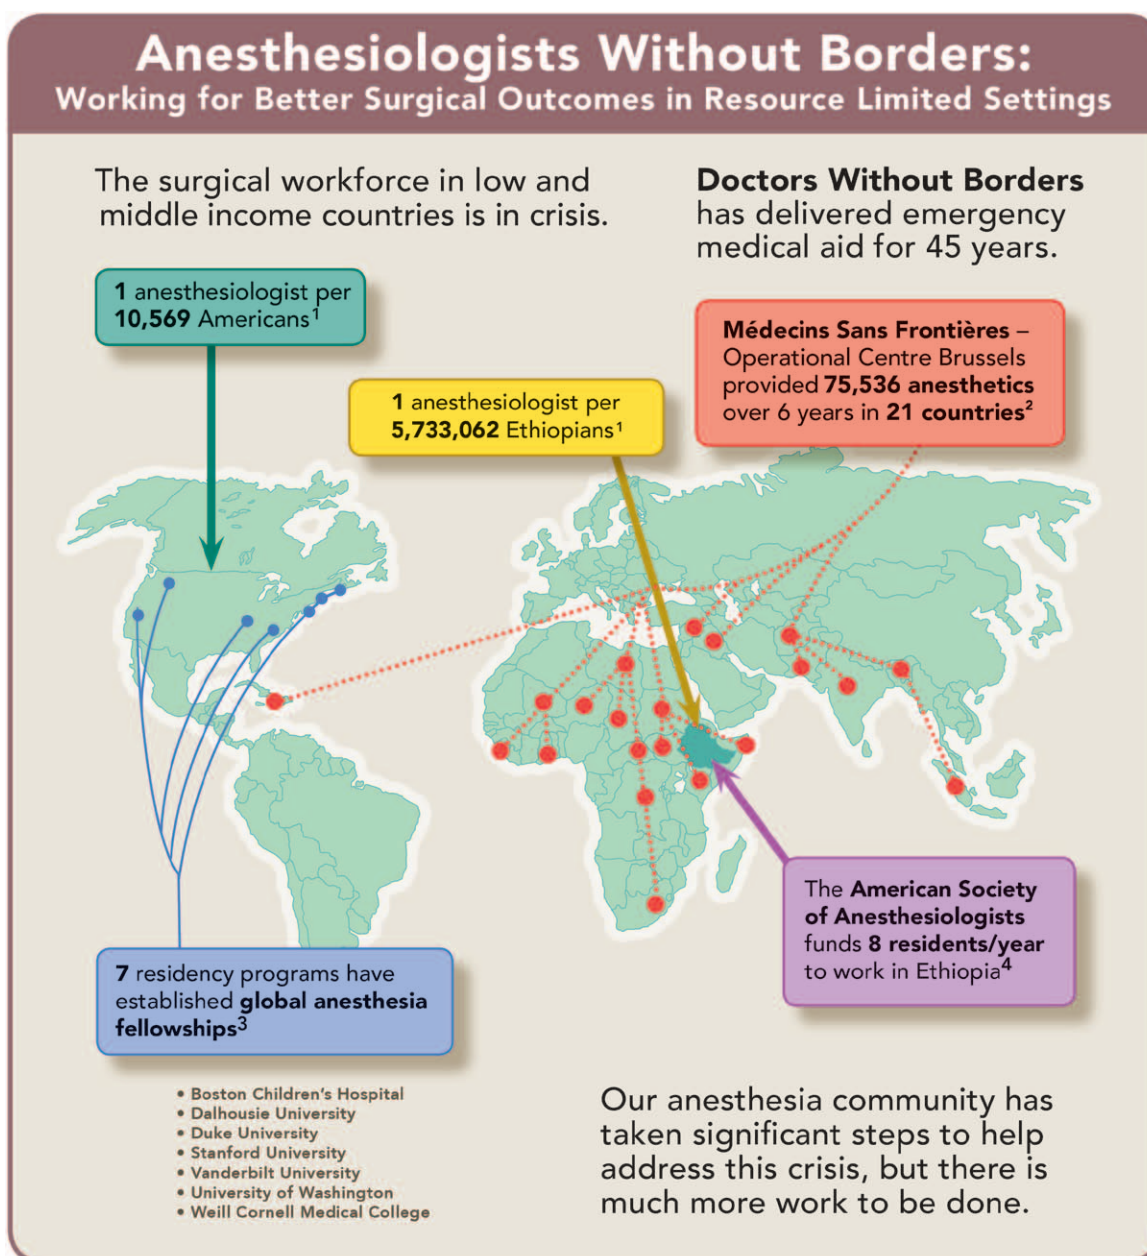

Infographic created by Jonathan P. Wanderer, Vanderbilt University School of Medicine; Kelly McQueen, Vanderbilt University School of Medicine; and James P. Rathmell, Brigham and Women's Health Care/Harvard Medical School. Illustration by Annemarie Johnson, Vivo Visuals. Dr. Wanderer is funded by the Foundation for Anesthesia Education and Research, Schaumburg, Illinois, and Anesthesia Quality Institute's Mentored Research Training Grant—Health Services Research, Schaumburg, Illinois. Address correspondence to Dr. Wanderer: jon.wanderer@vanderbilt.edu.

- Hendel S, Coonan T, Thomas S, McQueen K: The rate-limiting step: The provision of safe anesthesia in low-income countries. *World J Surg* 2015; 39:833-41
- Ariyo P, Trelles M, Helmand R, Amir Y, Hassani GH, Mftavyanka J, Nzeyimana Z, Akemani C, Ntawukiruwabo IB, Charles A, Yana Y, Moussa K, Kamal M, Suma ML, Ahmed M, Abdullahi M, Wong EG, Kushner A, Latif A: Providing anesthesia care in resource-limited settings: A 6-year analysis of anesthesia services provided at Médecins Sans Frontières facilities. *ANESTHESIOLOGY* 2016; 124:561-9
- McGoldrick RR, Crawford AM, McQueen KA: Global anesthesia fellowships. *ASA Newsletter* 2015; 79:30
- Drum ET: Introducing the ASA resident international anesthesia scholarship in Ethiopia. *ASA Newsletter* 2015; 79:28-9
